# Supplementary material for: A single-cell and spatial atlas of autopsy tissues reveals pathology and cellular targets of SARS-CoV-2
Source: PubMed Central journal article supplement (PMC7924267; doi:10.1101/2021.02.25.430130), 2021-02-25

## Supplemental Fig. 2

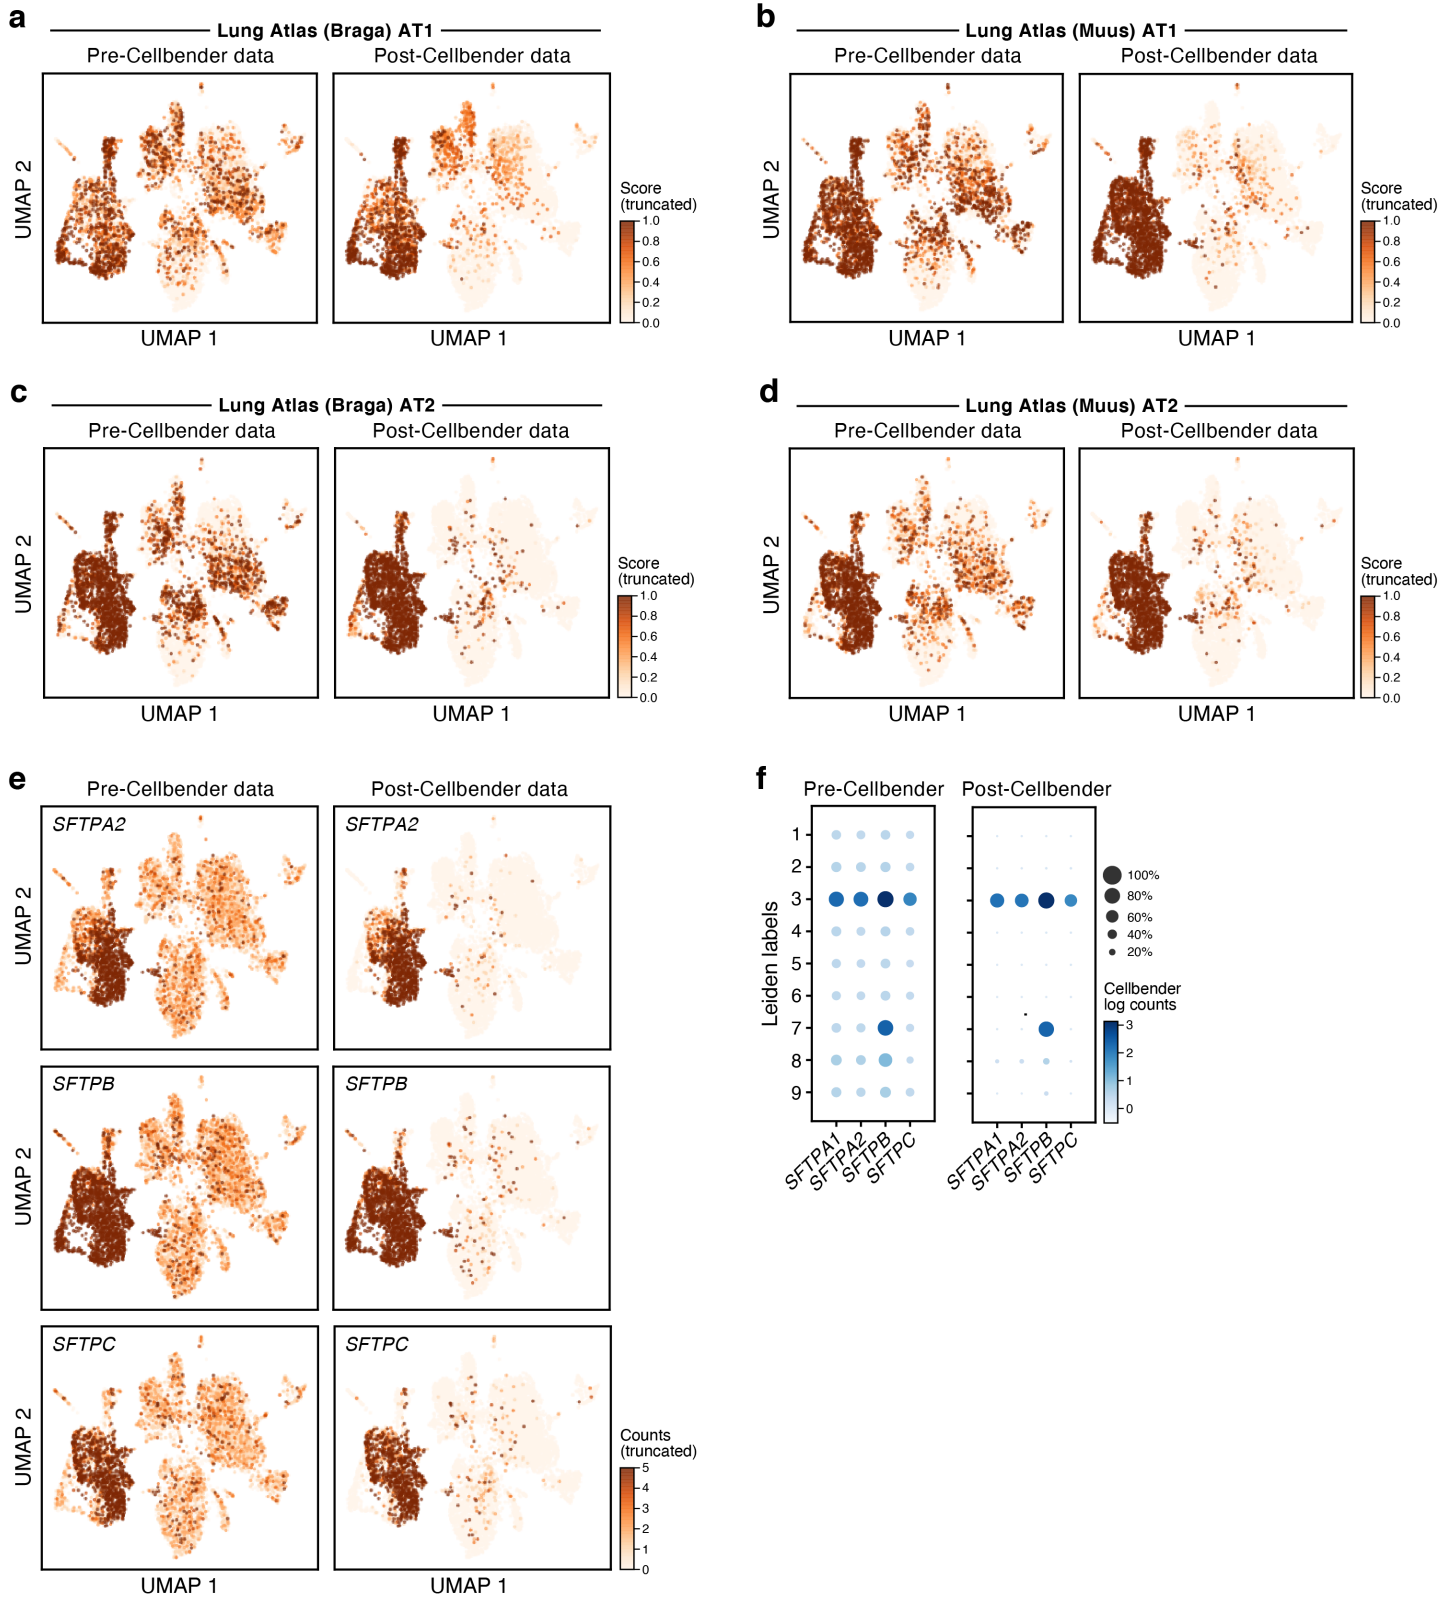

## Supplemental Fig. 3

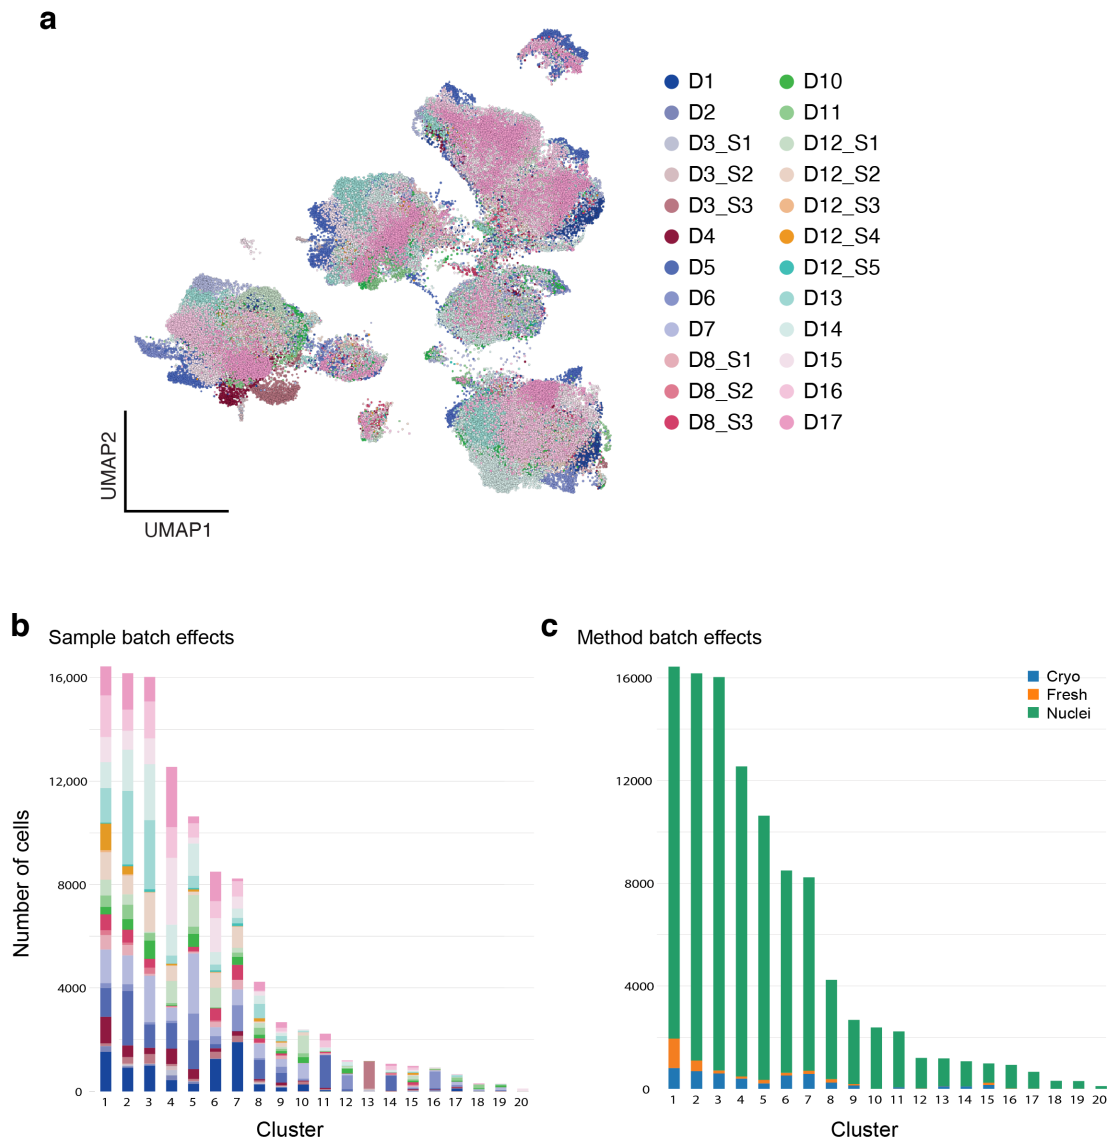

## Supplemental Fig. 4

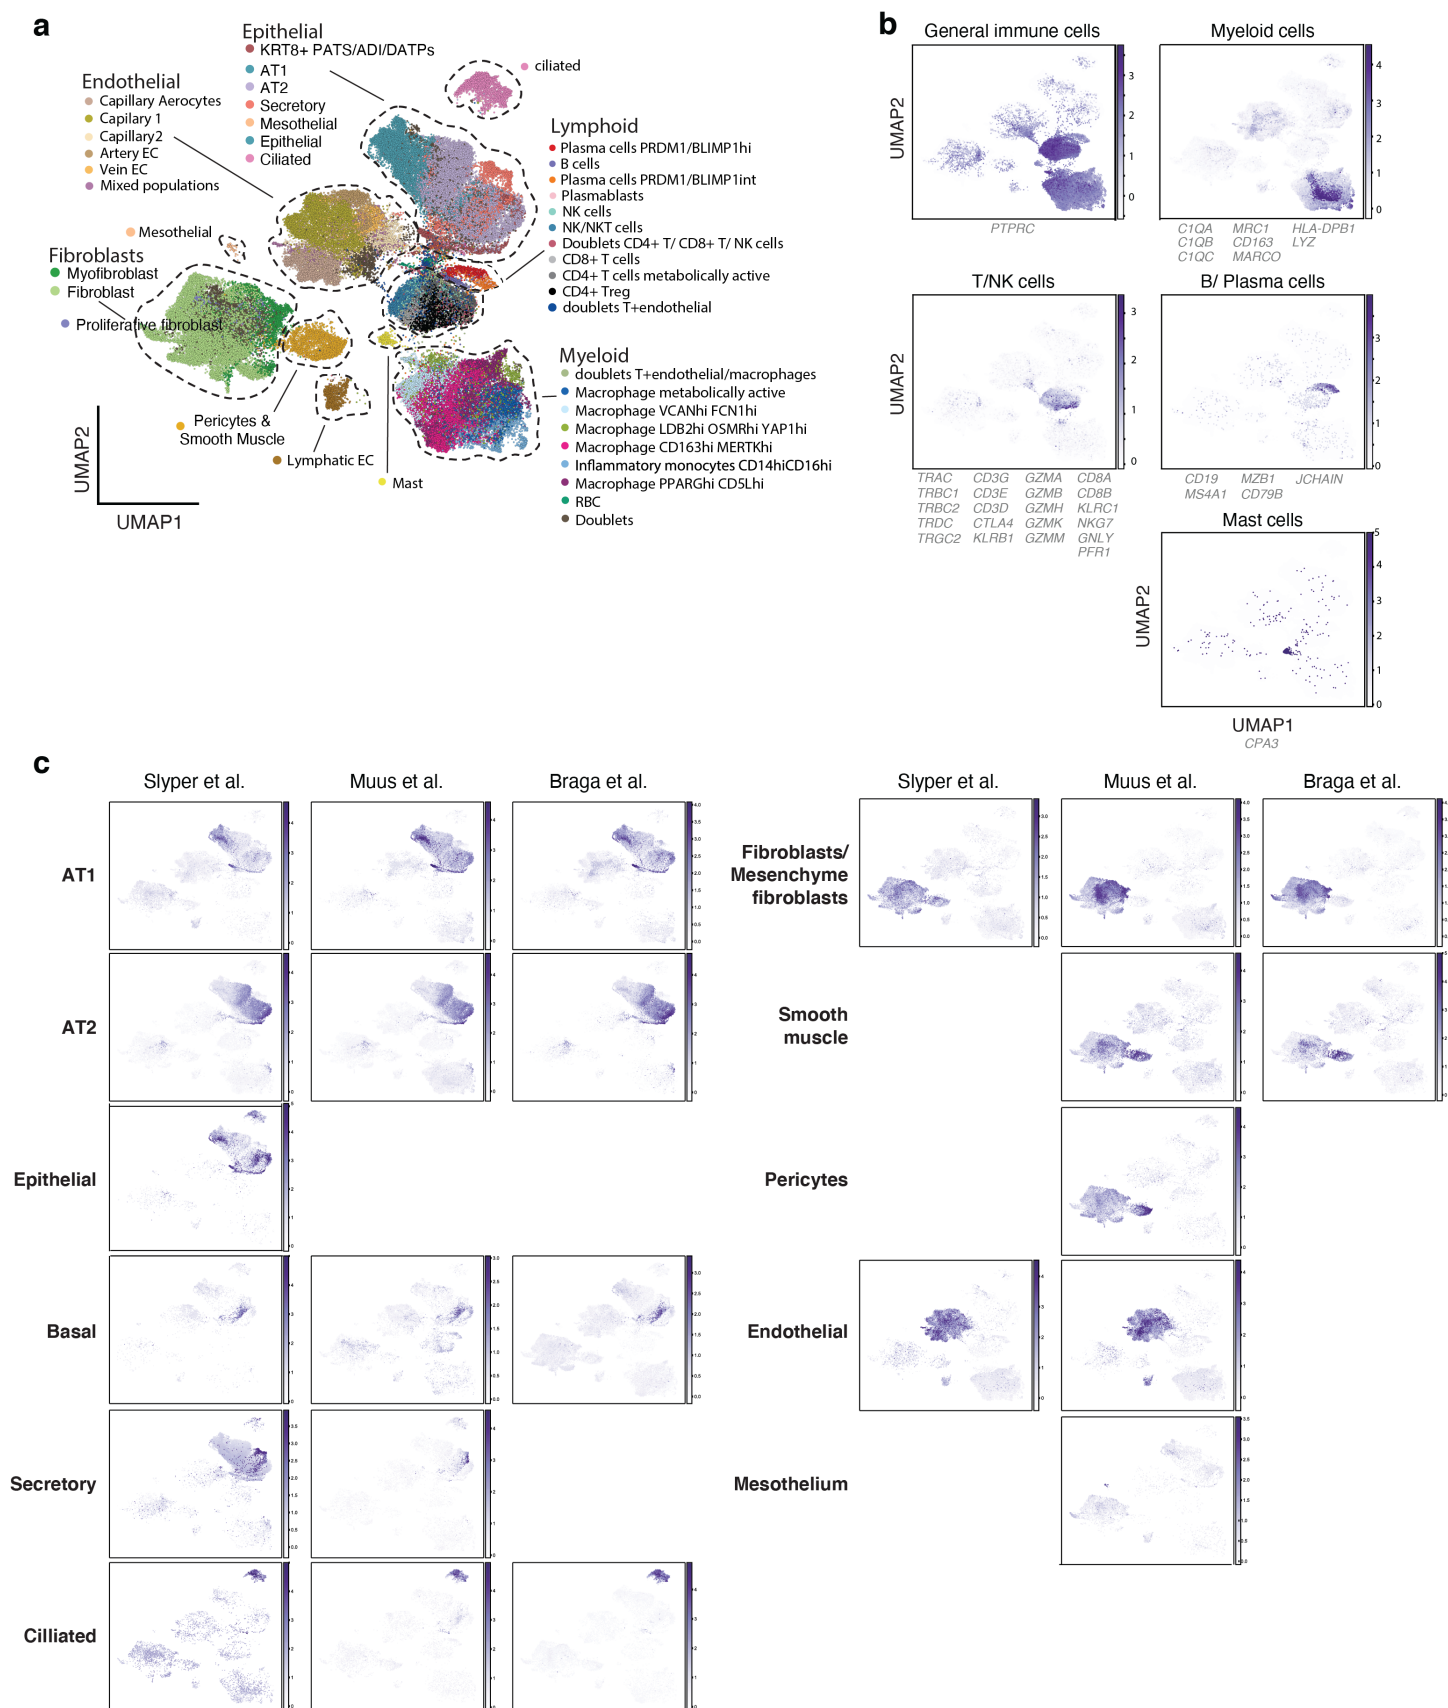

# Supplemental Fig. 4

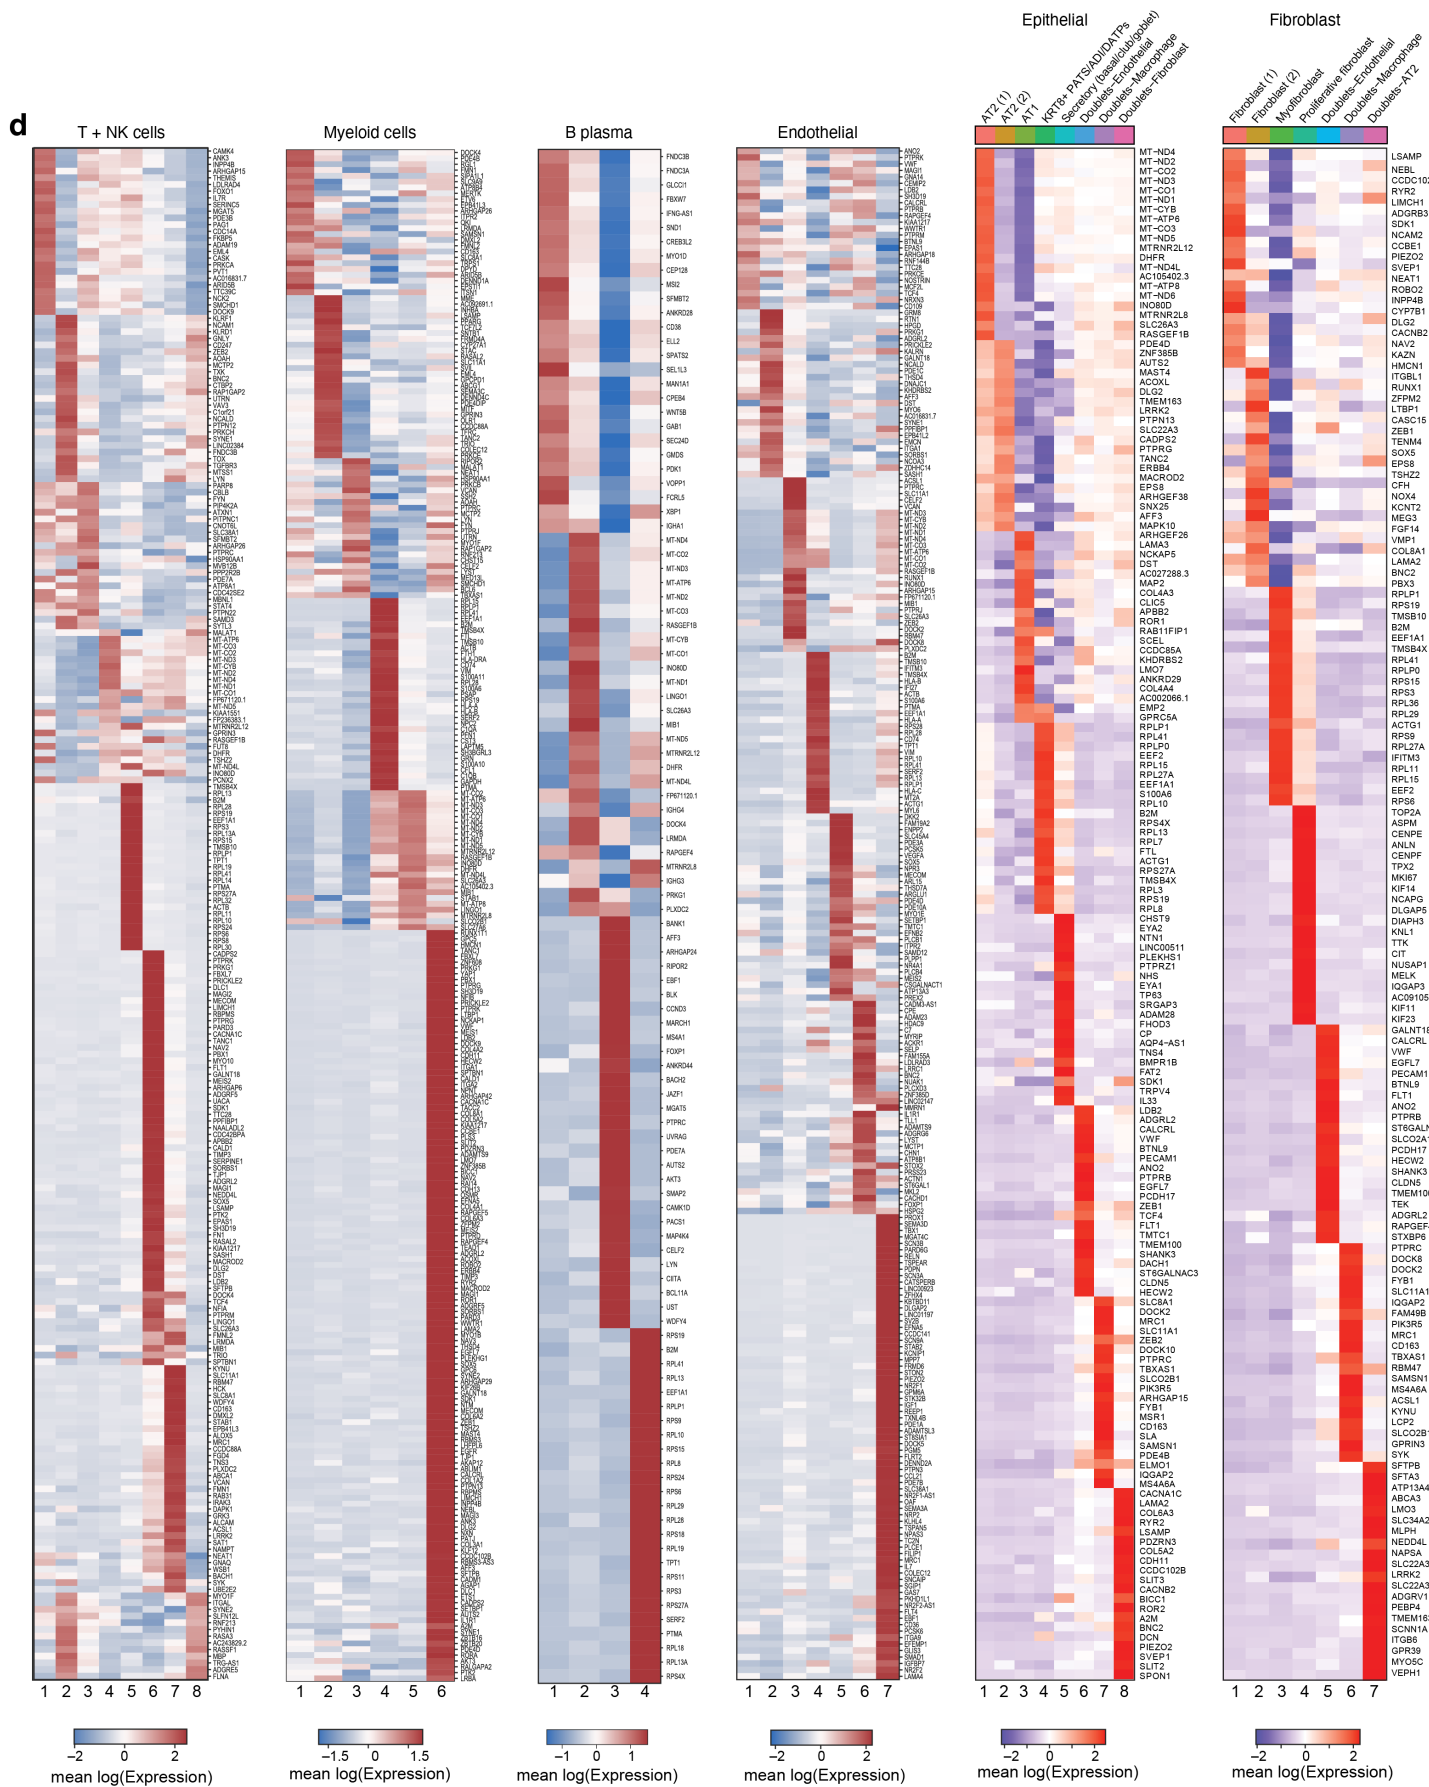

# Supplemental Fig. 4

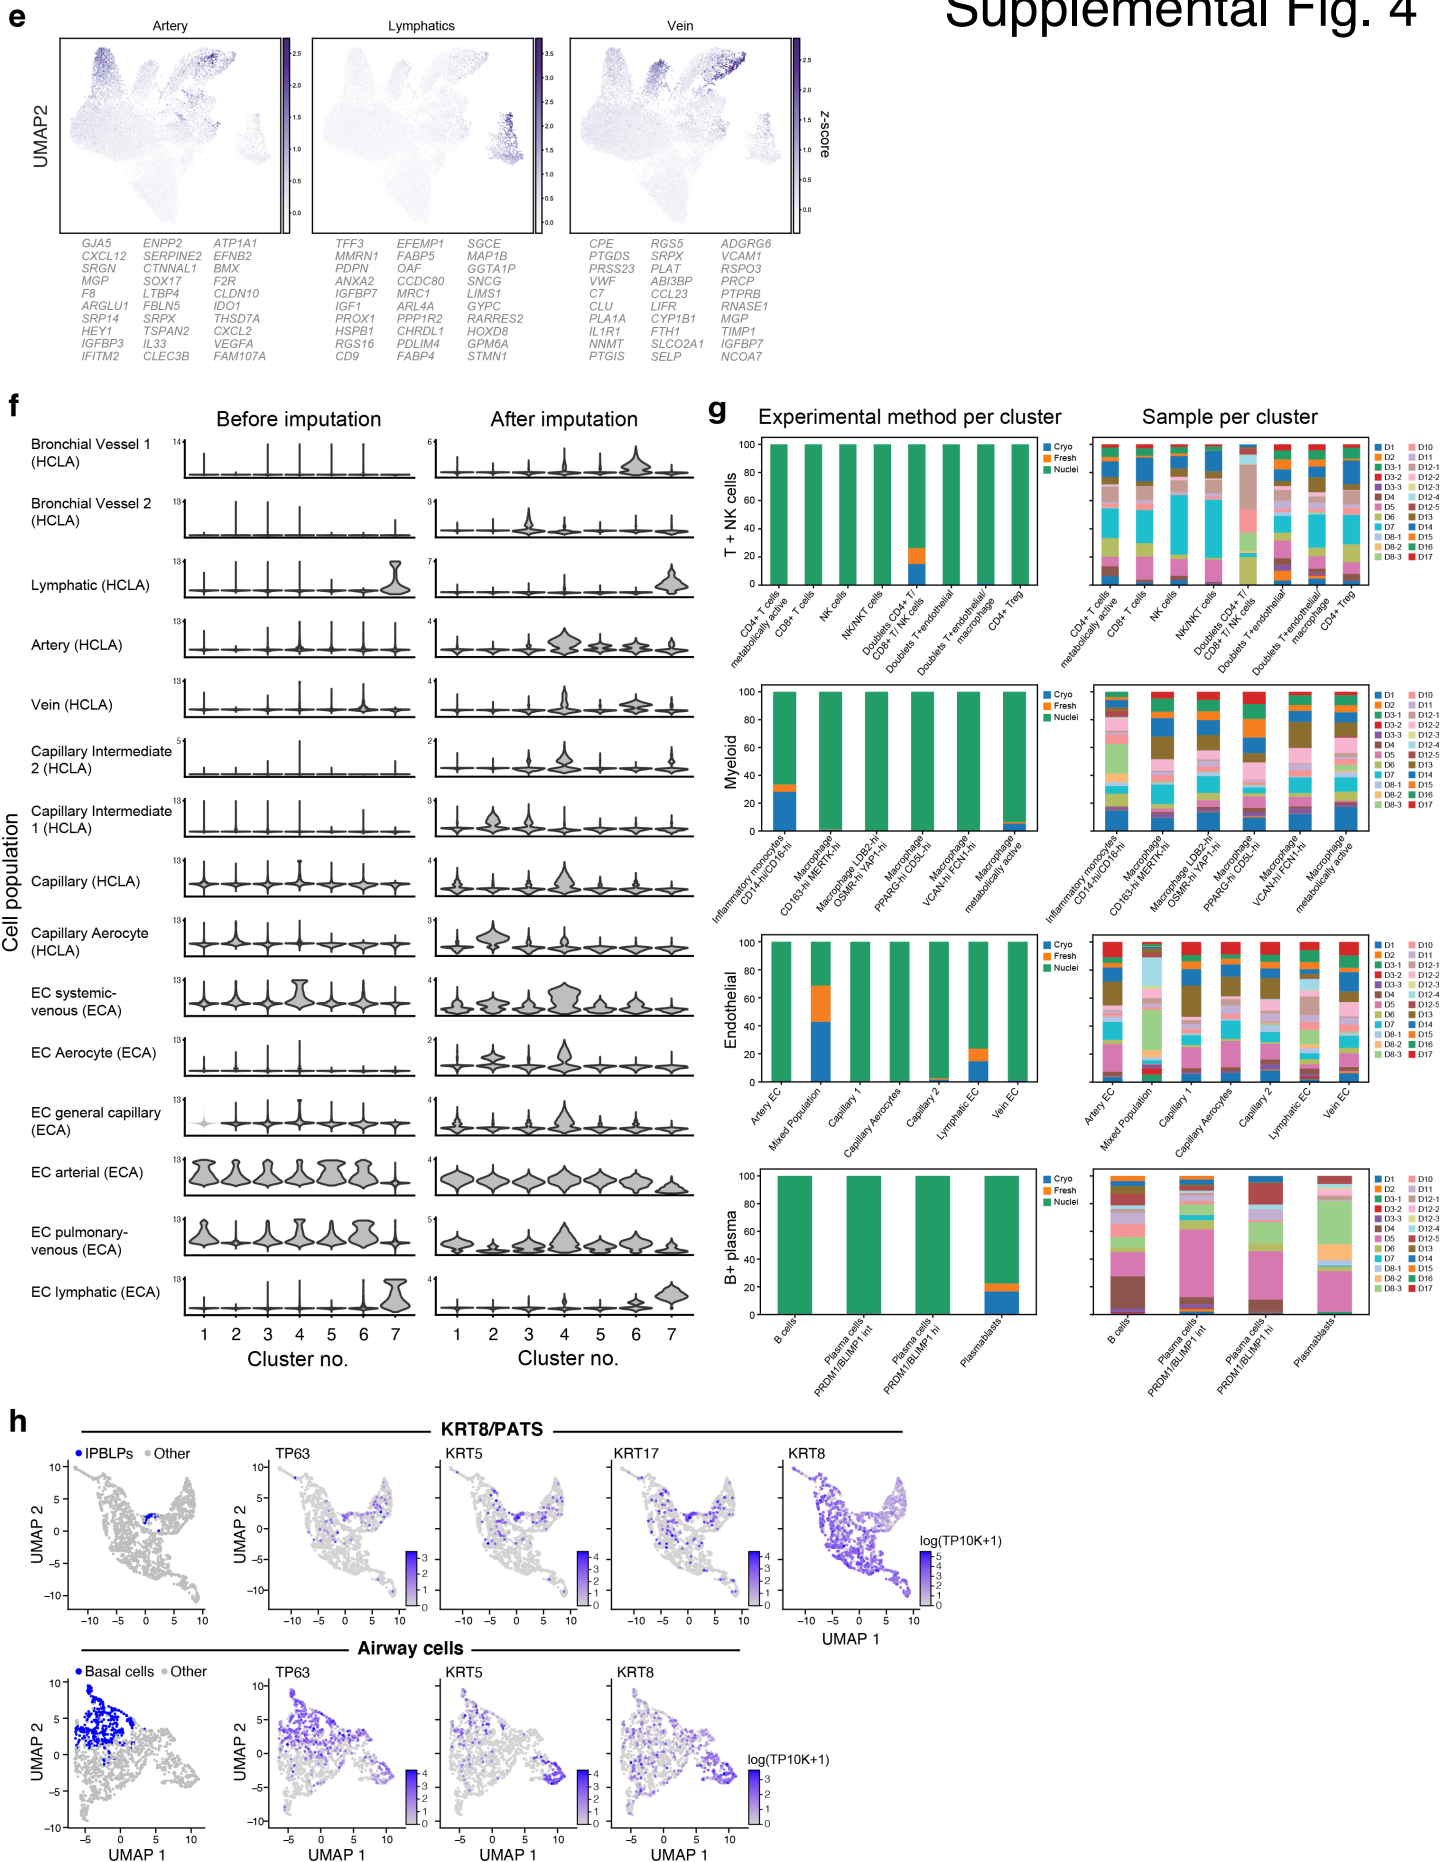

# Supplemental Fig. 5

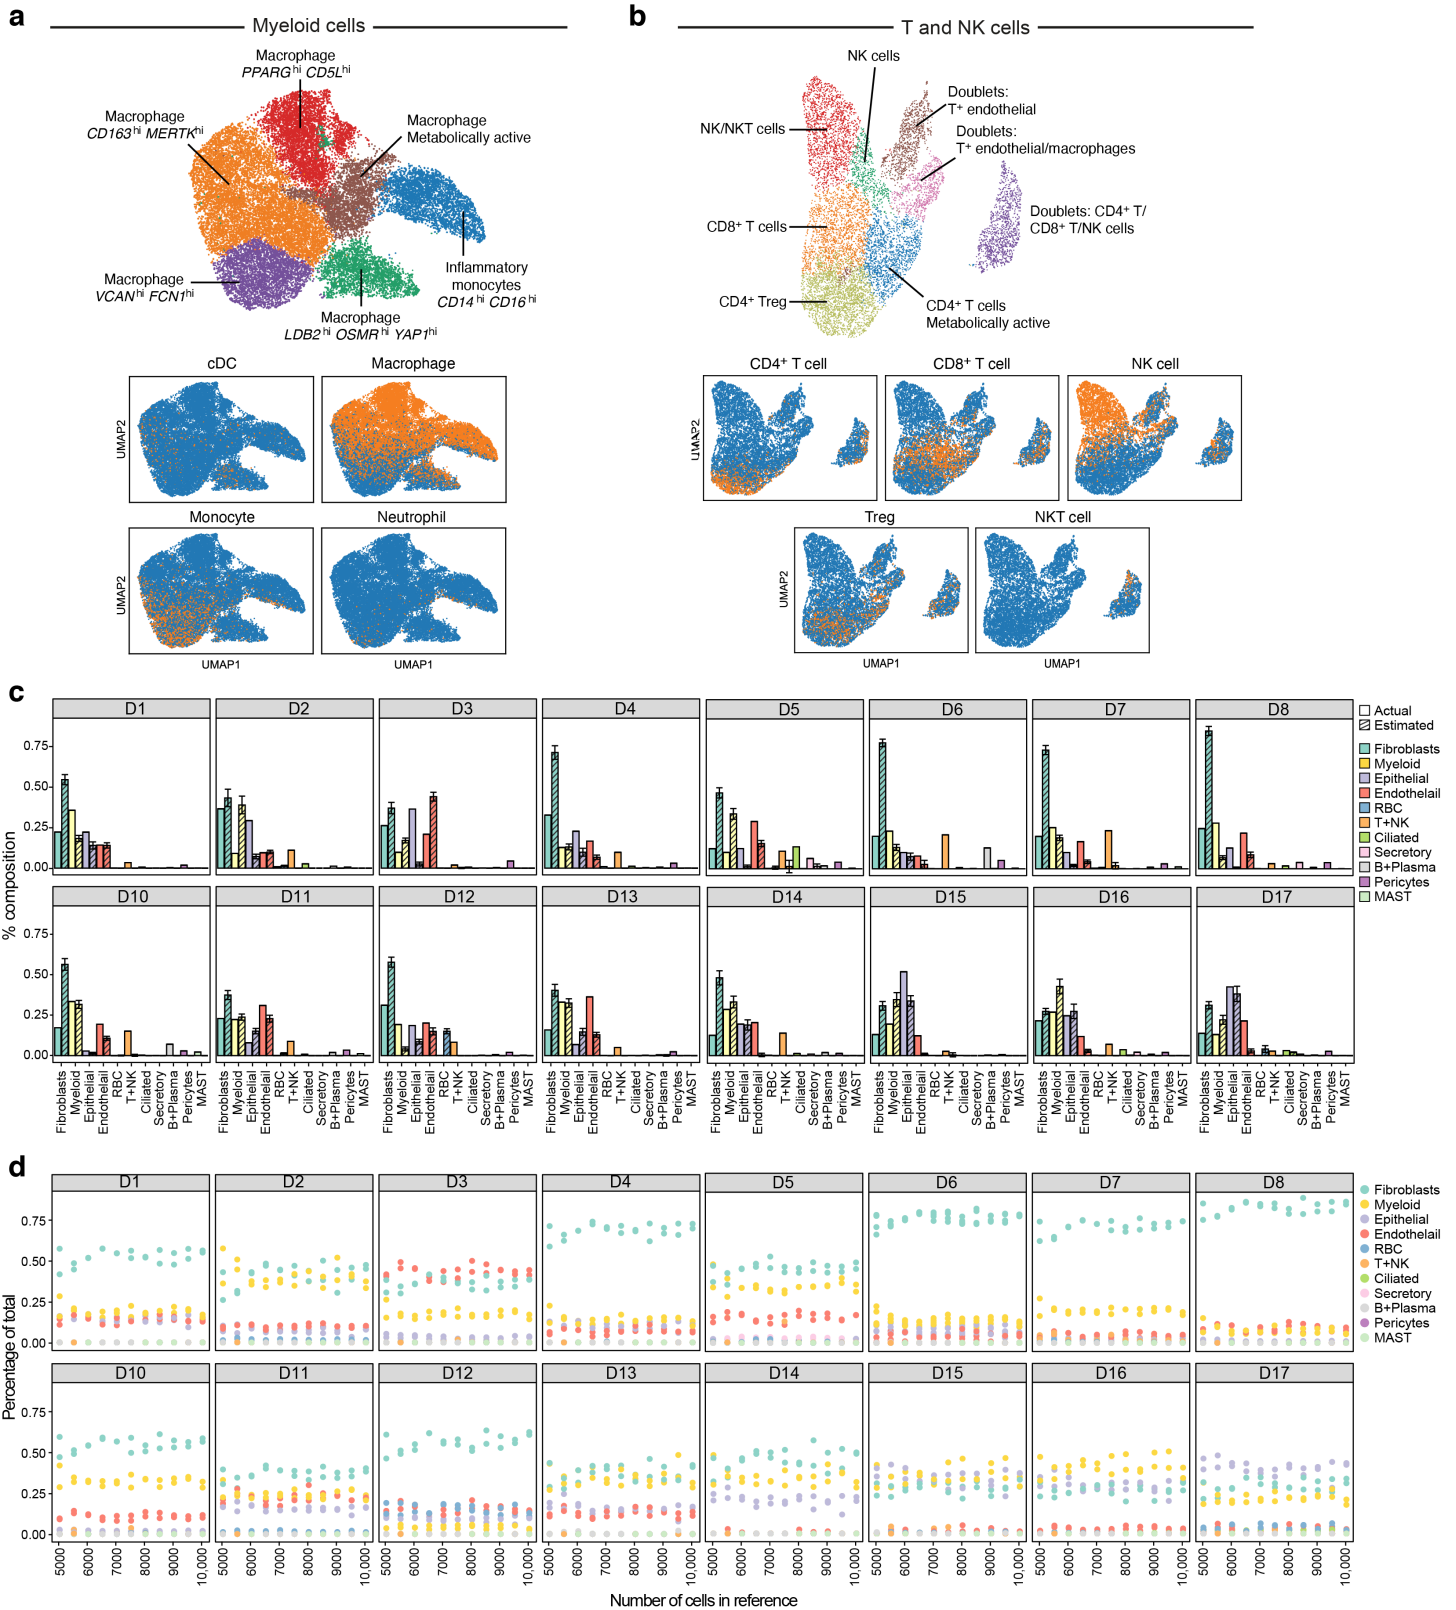

## Supplemental Fig. 6

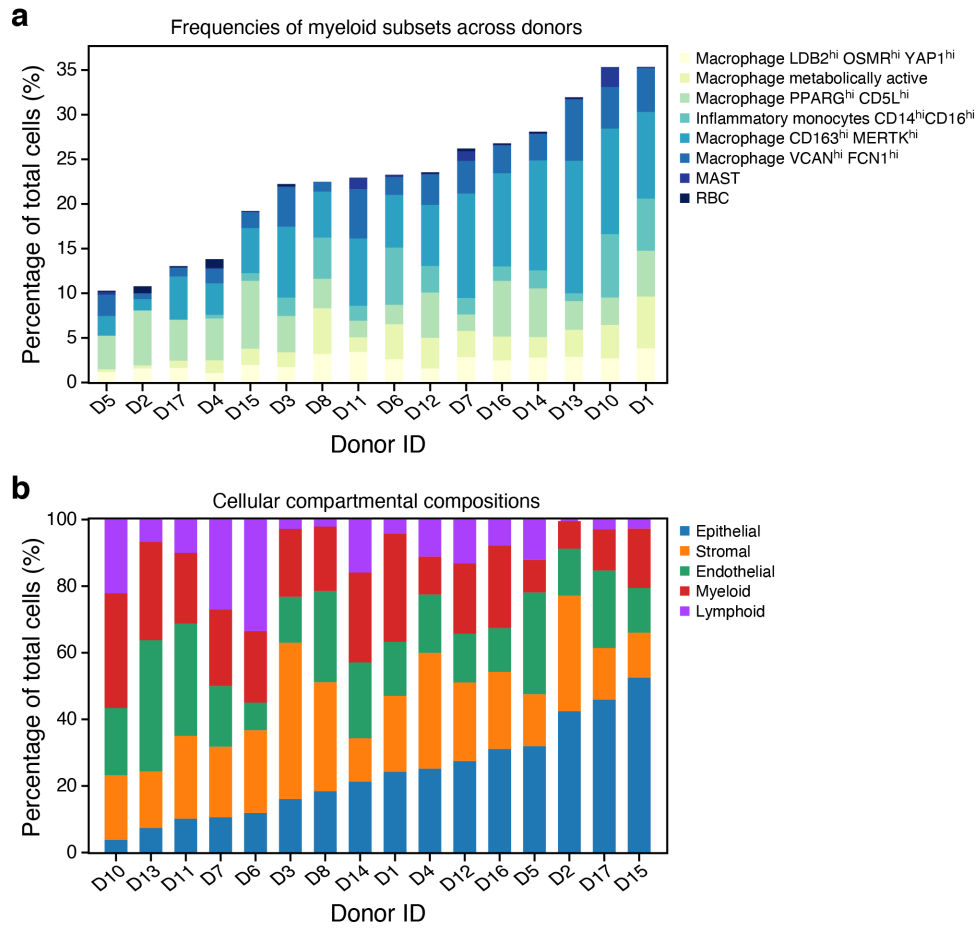



# Supplemental Fig. 7

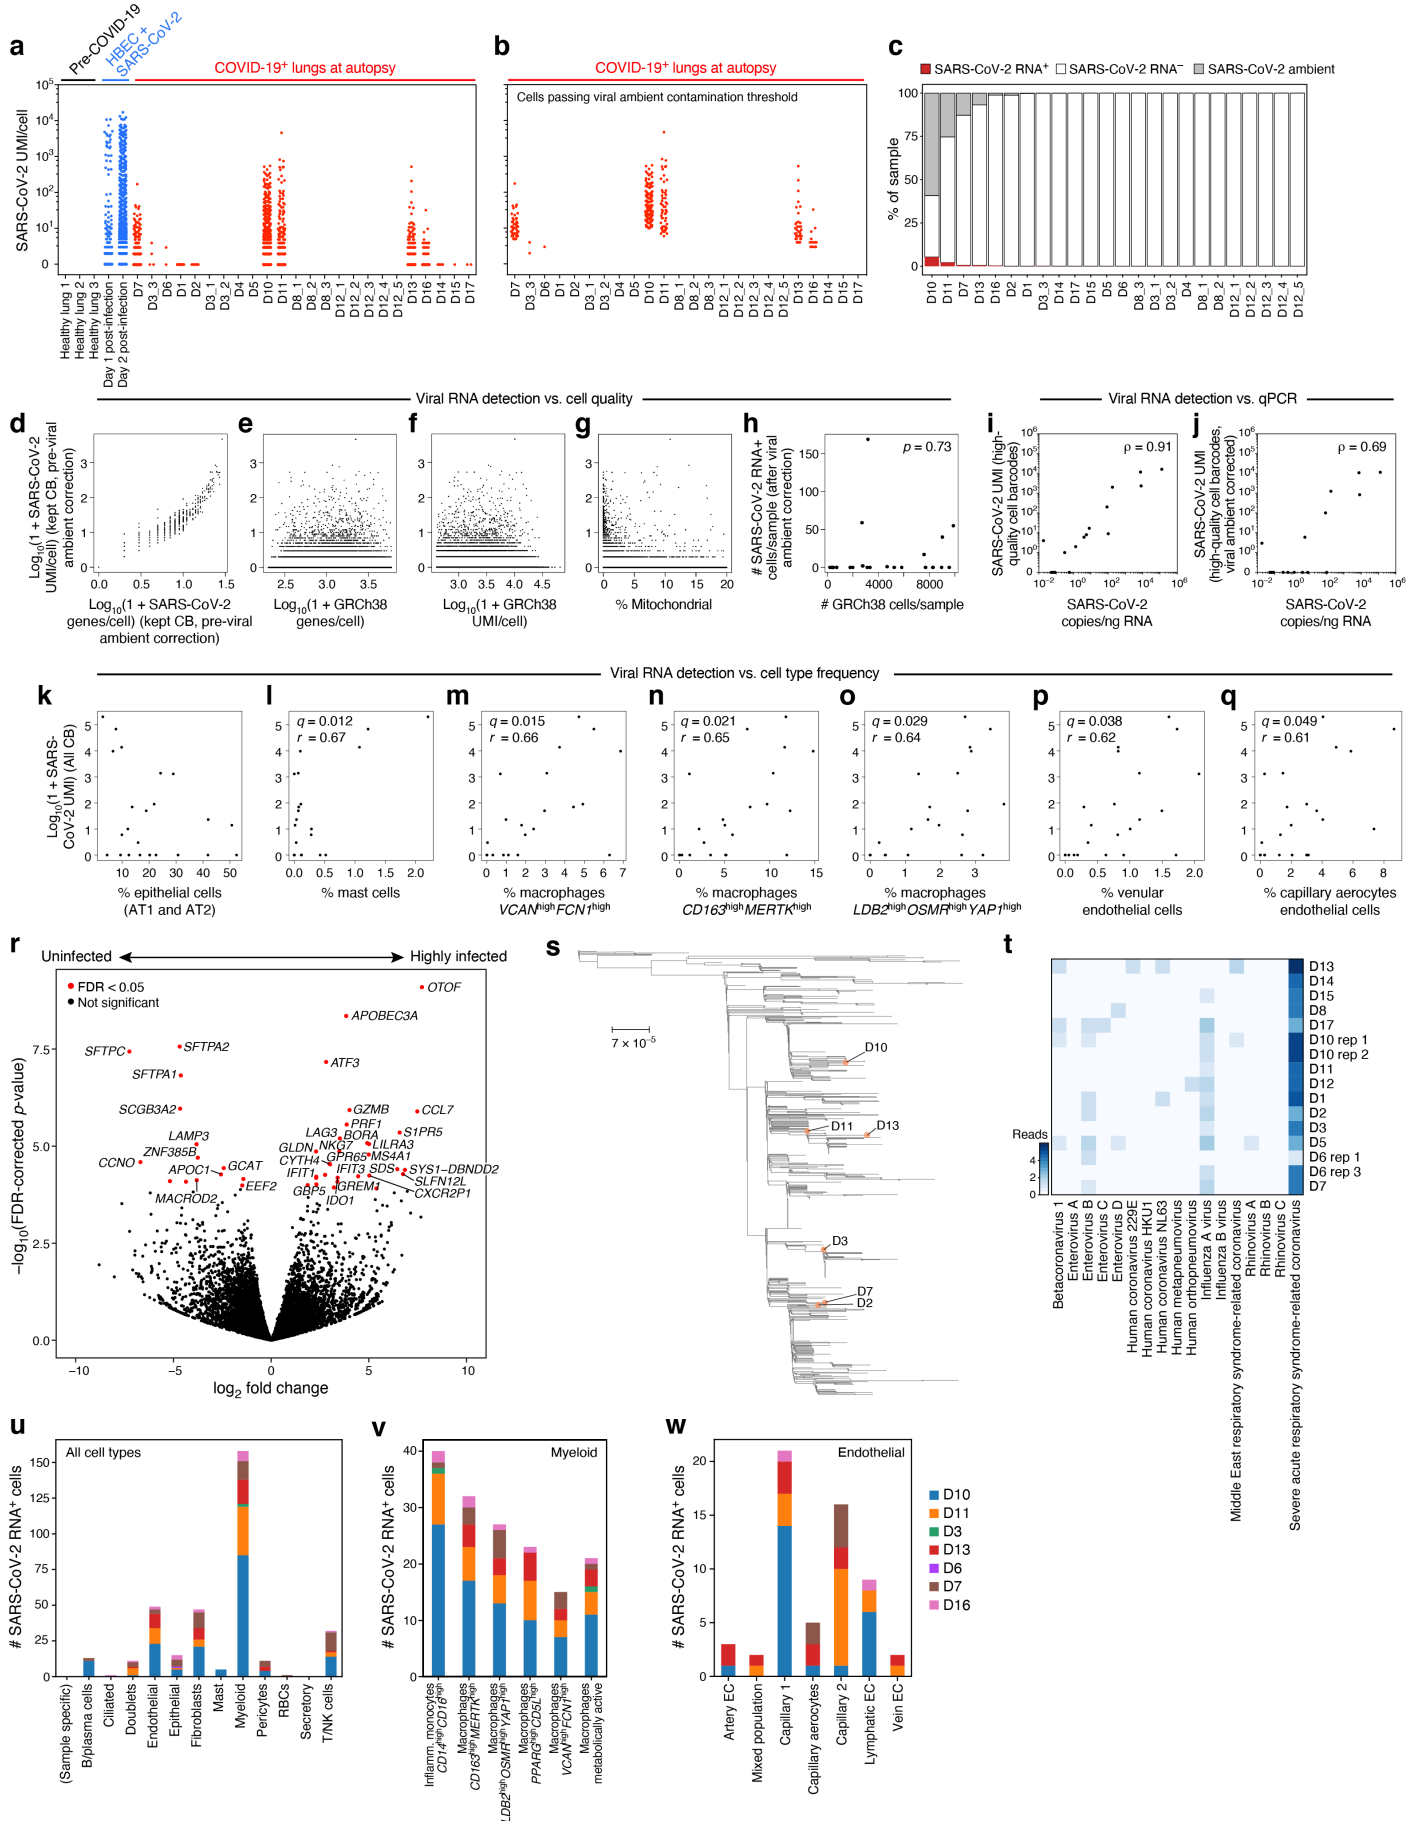

# Supplemental Fig. 8

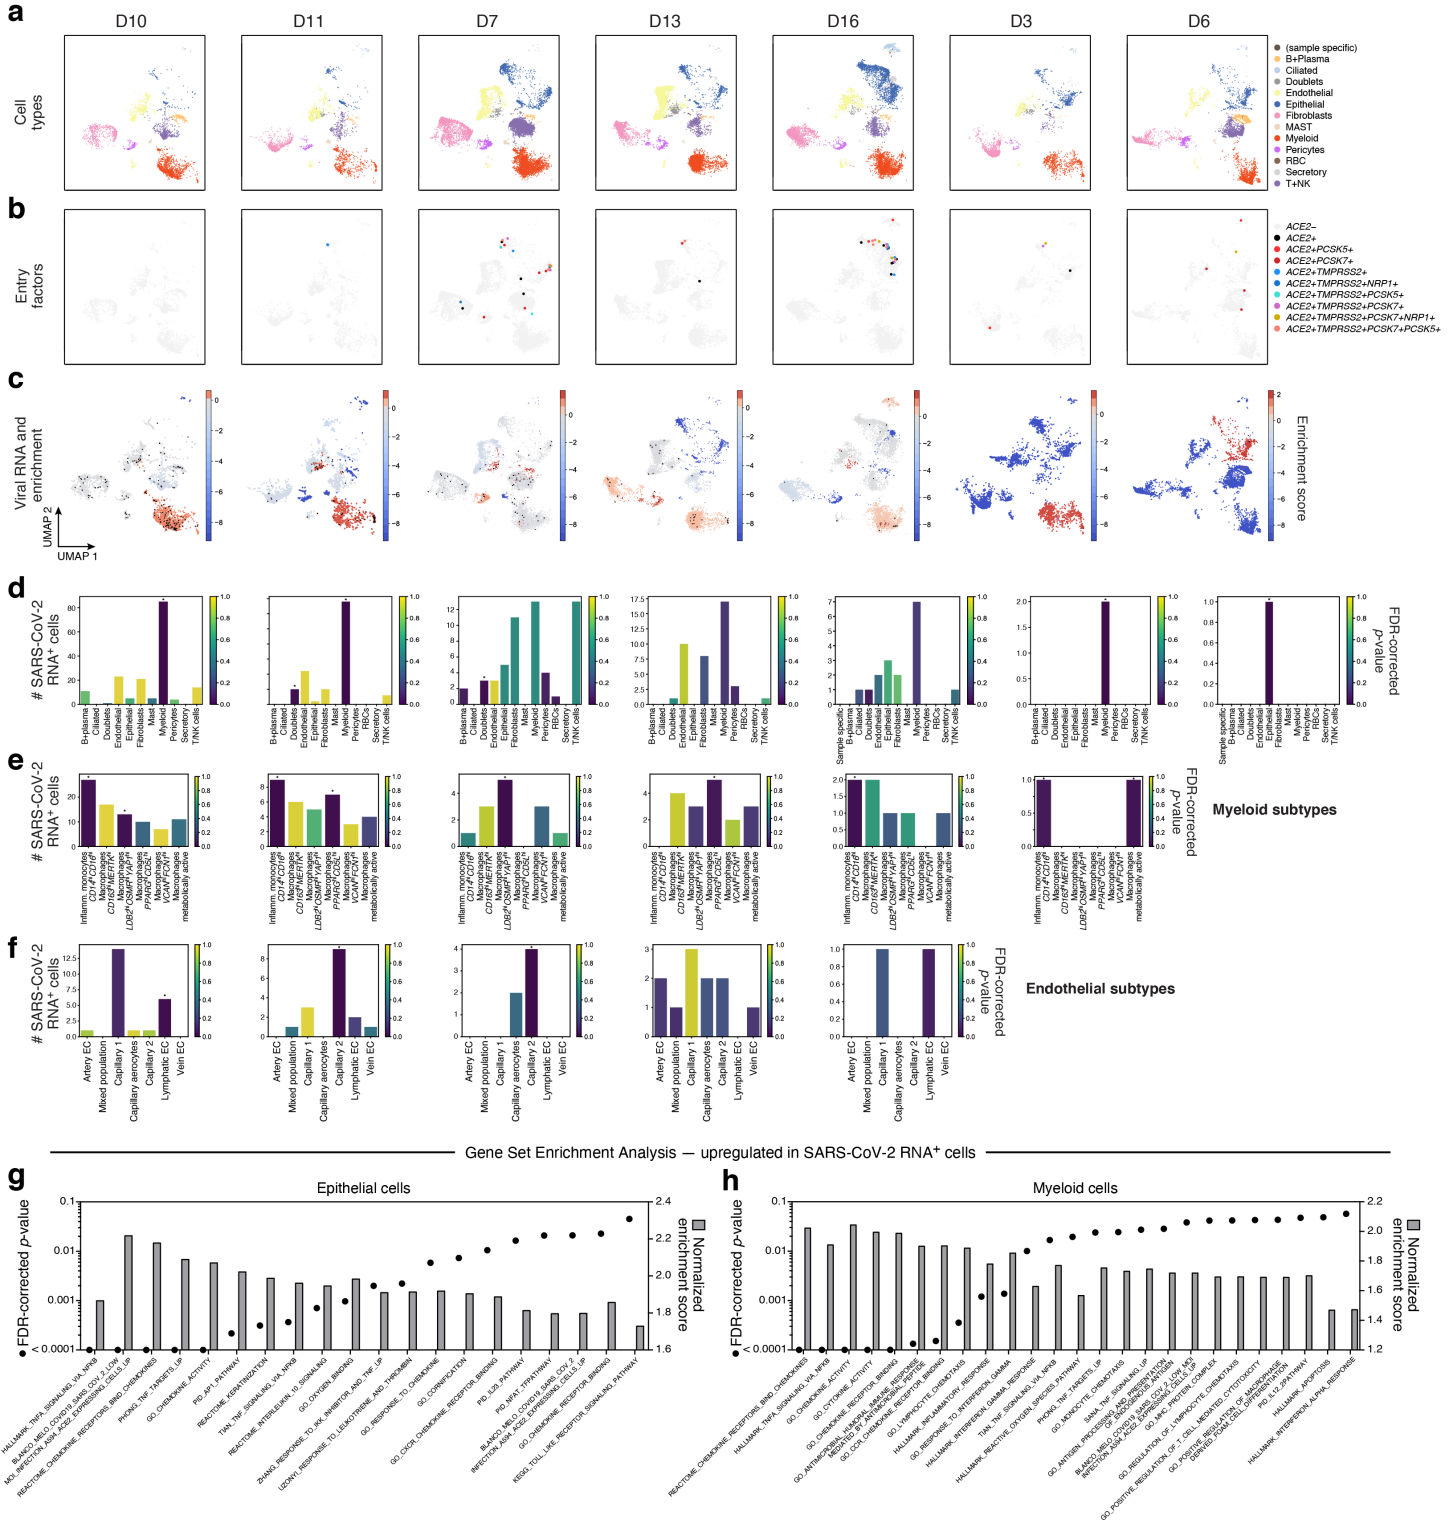

## Supplemental Fig. 9

|                   | Patient |            |           |                      |     | Tissues processed for spatial analysis |                   |                    | Processed for sn/scRNA-Seq | Organ failure | S/s to death (days) |         |
|-------------------|---------|------------|-----------|----------------------|-----|----------------------------------------|-------------------|--------------------|----------------------------|---------------|---------------------|---------|
|                   | No      | Broad ID   | Race      | Ethnicity            | Sex | Age                                    | CTA               | WTA                |                            |               |                     | Protein |
| COVID-19 negative | D22     | 04-P718490 | White     | Not Hispanic/ Latino | M   | 50-55                                  | Parenchyma        | Parenchyma         | Parenchyma                 | No            | Multi-organ         | 3       |
|                   | D23     | 04-P939373 | Black/ AA | Not Hispanic/ Latino | F   | 75-80                                  | Parenchyma        | Parenchyma         | Parenchyma                 | No            | Heart               | 0       |
|                   | D24     | 04-P978210 | White     | Not Hispanic/ Latino | M   | 50-55                                  | Parenchyma        | Parenchyma         | Parenchyma                 | No            | Multi-organ         | 5       |
| COVID-19 positive | D18     | 04-P373577 | Black/ AA | –                    | F   | 65-70                                  | Lung-LUL          | Lung-LUL, -RUL     | Lung-LUL                   | No            | Lung                | 15      |
|                   | D19     | 04-P433472 | Other     | Hispanic/ Latino     | M   | 55-60                                  | Lung-LUL          | Lung-LUL, -LLL     | Lung-LUL                   | No            | Lung                | 6       |
|                   | D20     | 04-P478538 | White     | –                    | F   | 65-70                                  | Lung-LUL, trachea | Lung-LUL, heart-LV | Lung-LUL                   | No            | Lung, heart         | 1       |
|                   | D21     | 04-P541935 | –         | Hispanic/ Latino     | M   | 55-60                                  | Lung-LUL          | Lung-LUL           | Lung-LUL                   | No            | Lung                | 2       |
|                   | D8      | 04-P006354 | Black/ AA | Hispanic/ Latino     | M   | 65-70                                  | Lung-LUL          | Lung-LUL           | Lung-LUL                   | Yes           | Lung, kidney        | 23      |
|                   | D9      | 04-P024506 | Black/ AA | Not Hispanic/ Latino | F   | 50-55                                  | Lung-LUL          | Lung-LUL           | Lung-LUL                   | No            | Lung                | 7       |
|                   | D10     | 04-P054921 | White     | Not Hispanic/ Latino | M   | 50-55                                  | Lung-LUL          | Lung-LUL           | Lung-LUL                   | Yes           | Multi-organ         | 8       |
|                   | D11     | 04-P079042 | White     | –                    | M   | 75-80                                  | Lung-LUL          | Lung-LUL           | Lung-LUL                   | Yes           | Lung, kidney        | 7       |
|                   | D12     | 04-P103142 | White     | Not Hispanic/ Latino | M   | 40-45                                  | Lung-LUL          | Lung-LUL           | Lung-LUL                   | Yes           | Multi-organ         | 22      |

# Supplemental Fig. 10

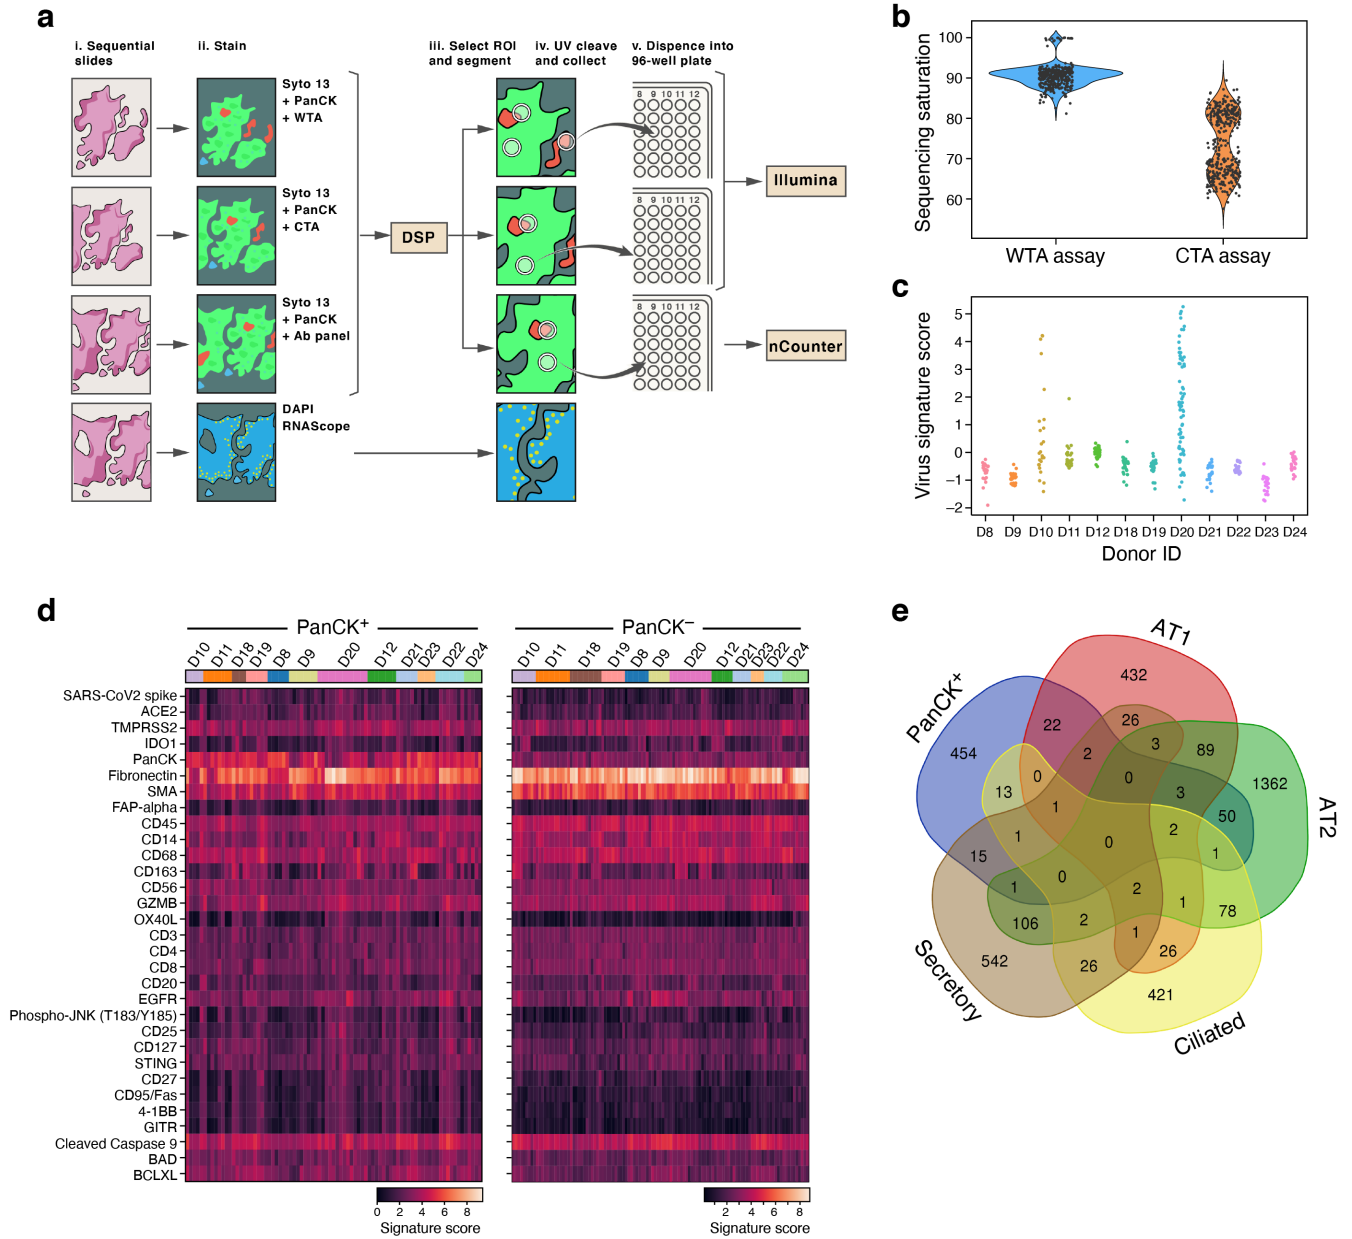

# Supplemental Fig. 11

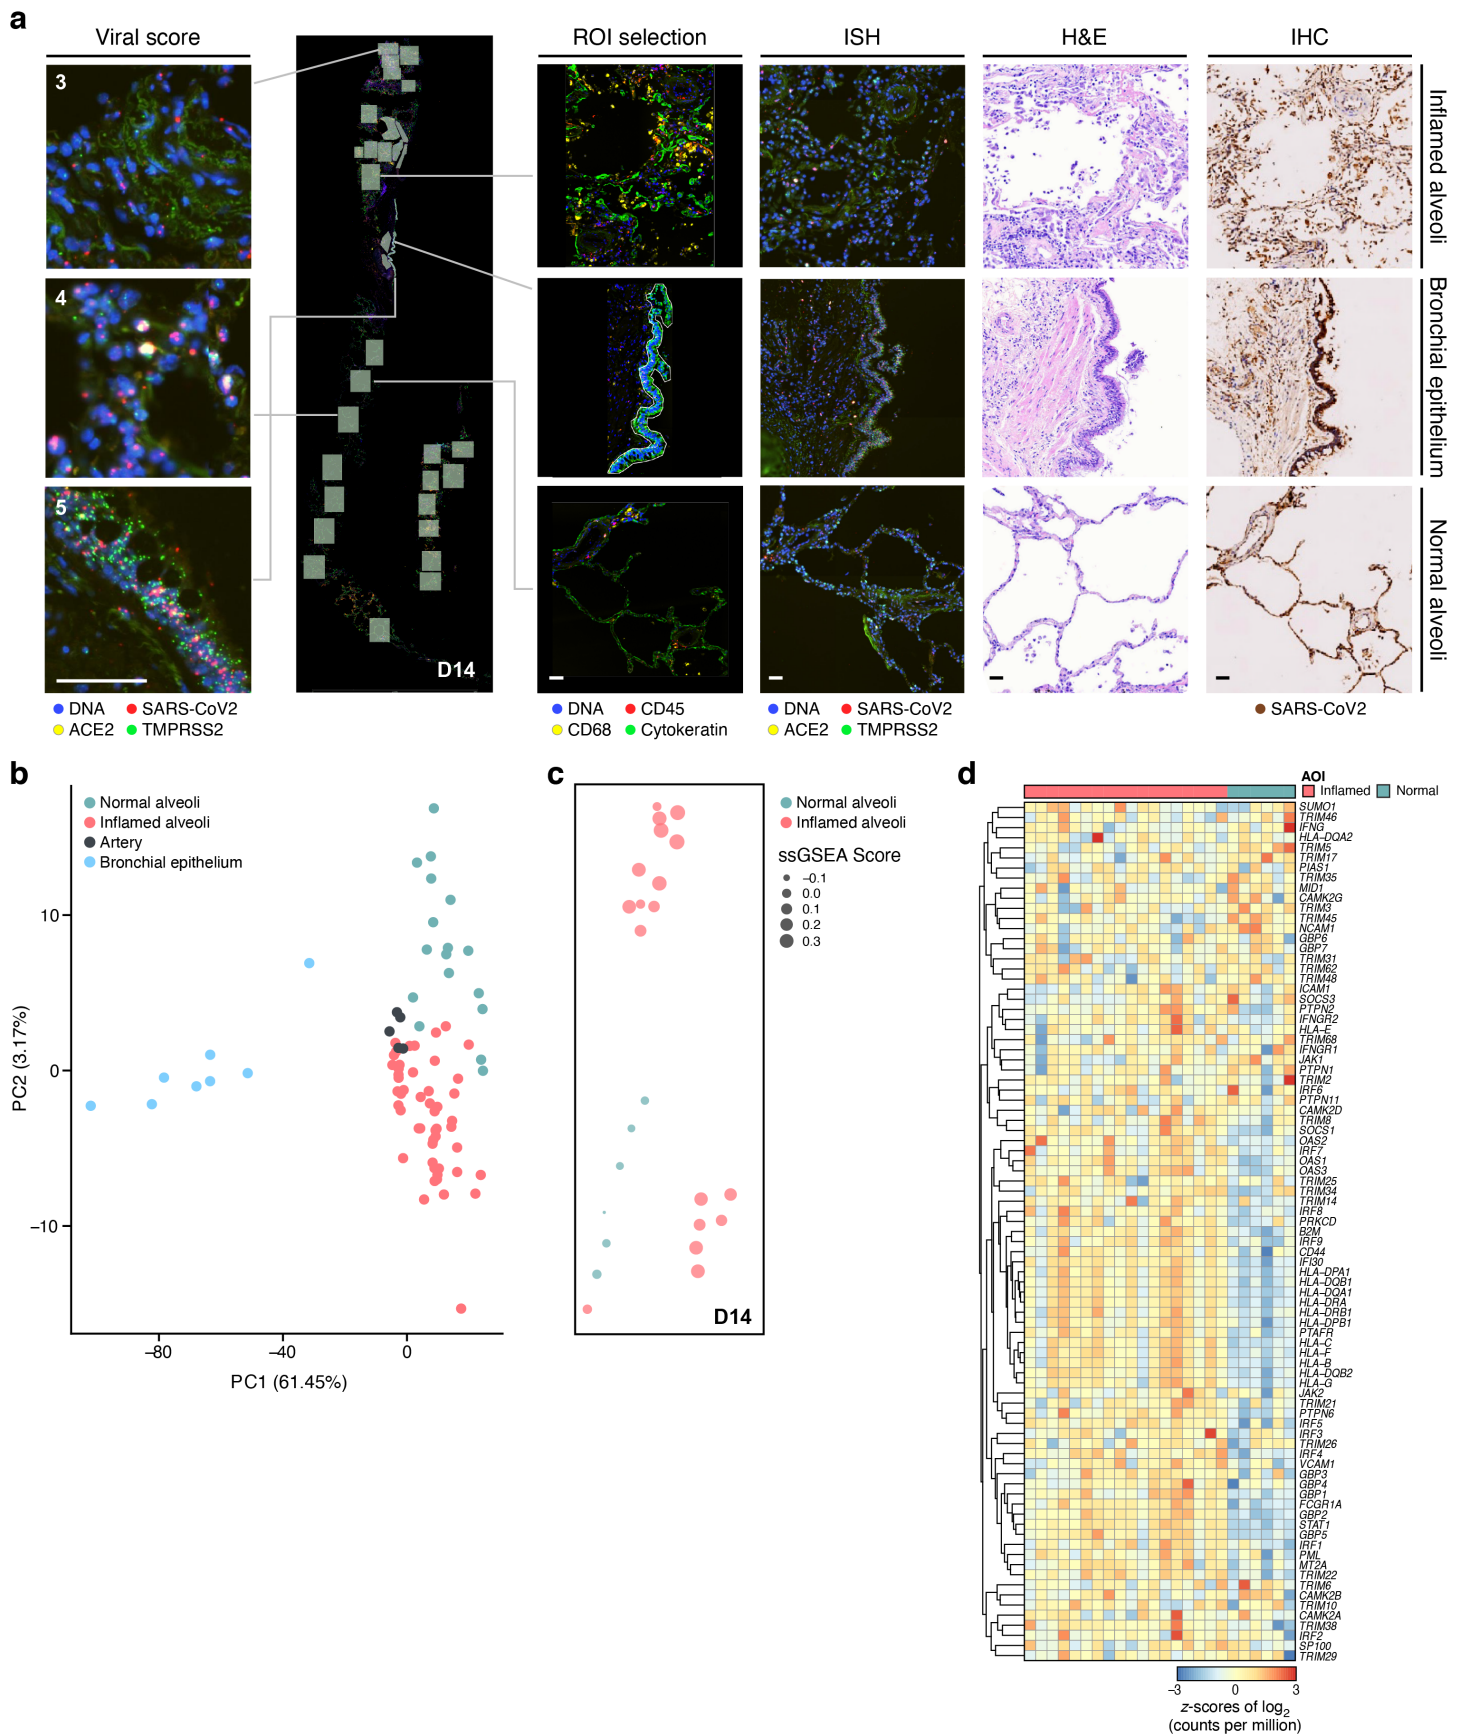

## Supplemental Fig. 12

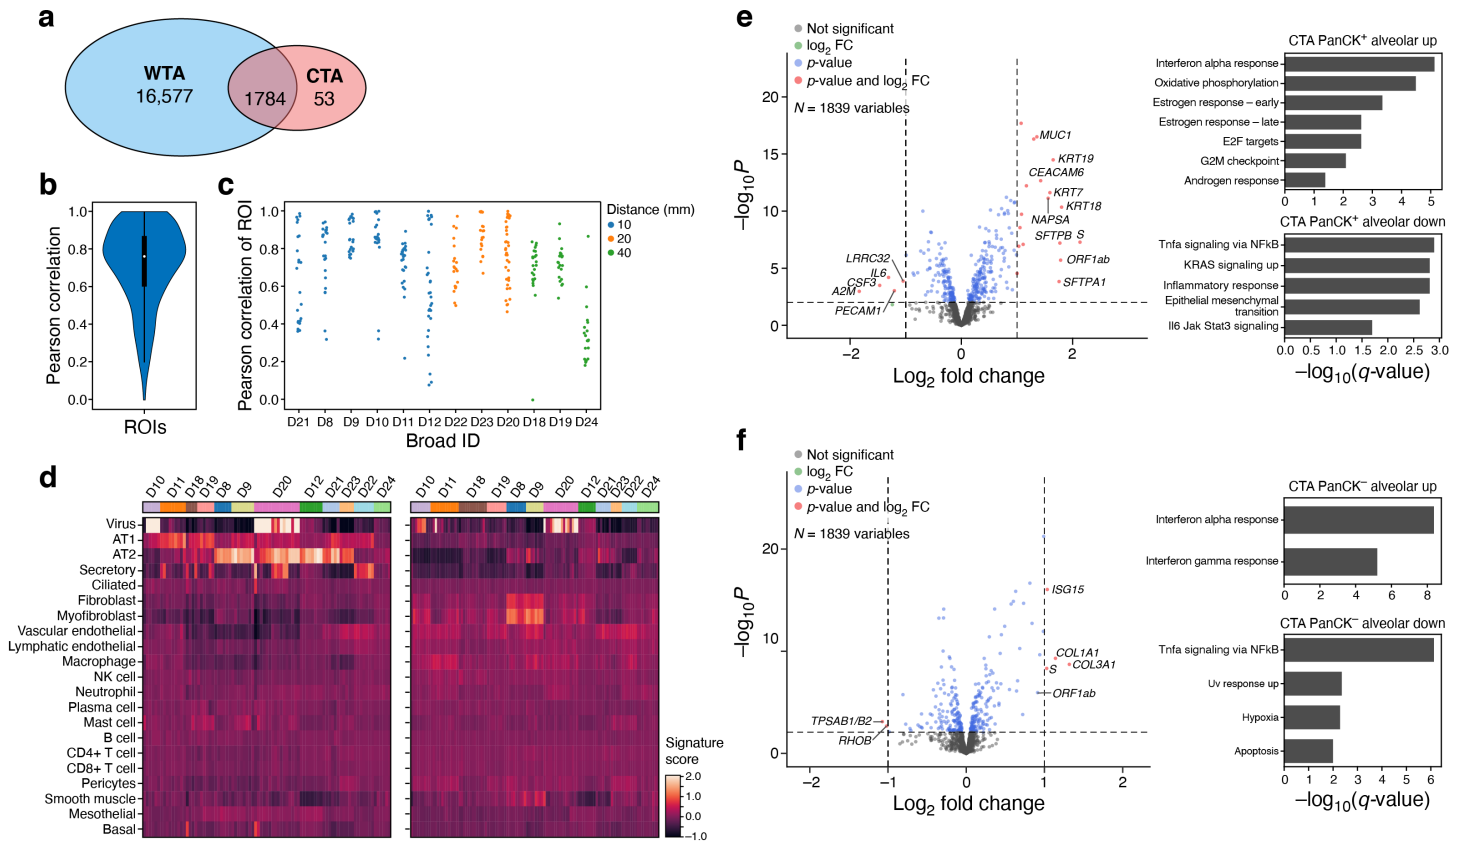

## Supplemental Fig. 13

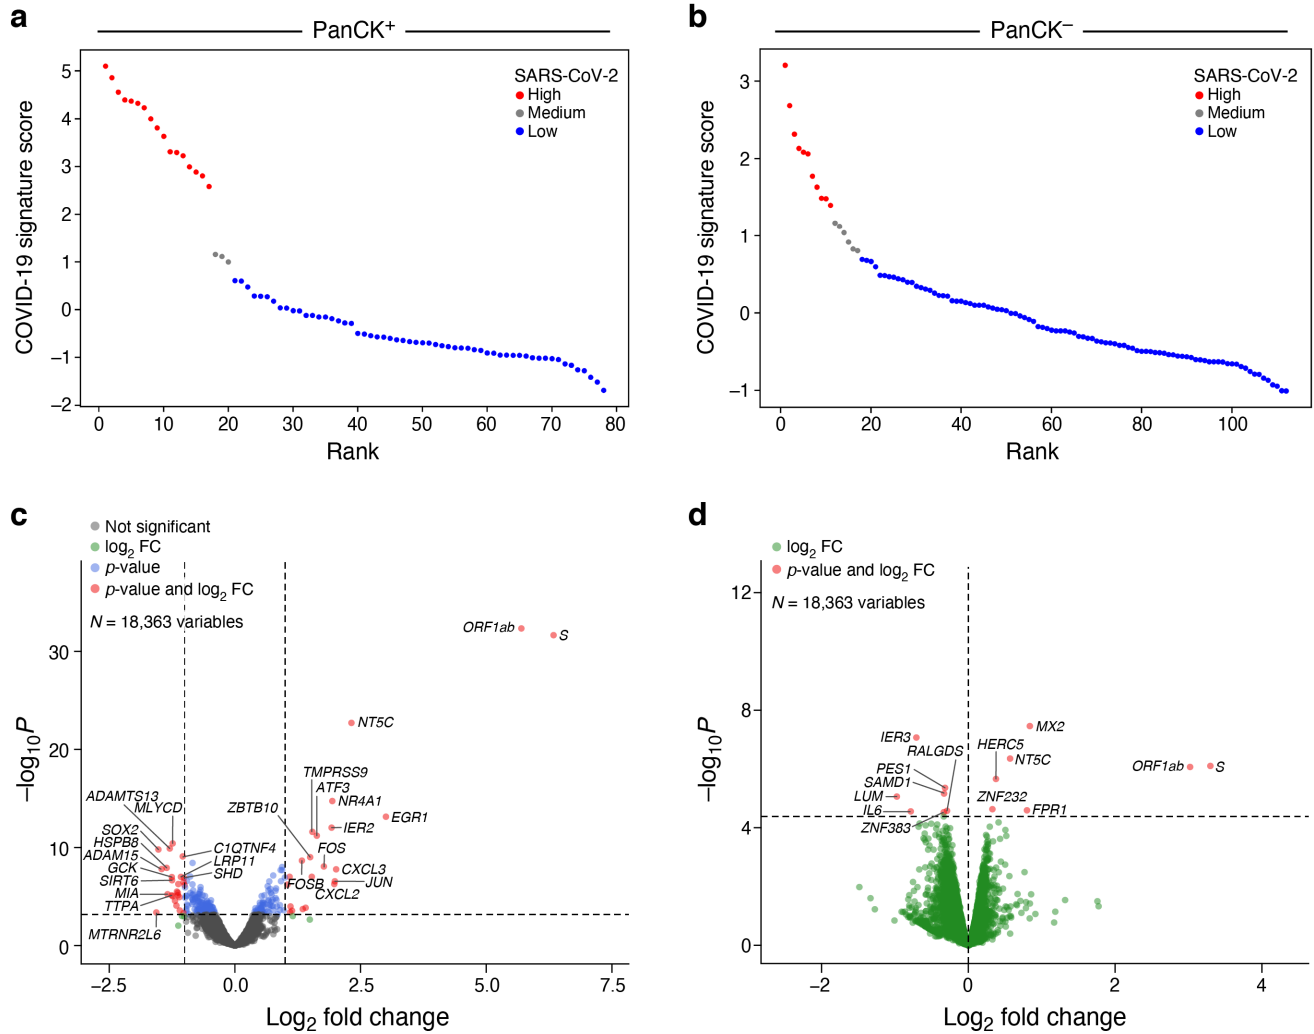

# Supplemental Fig. 14

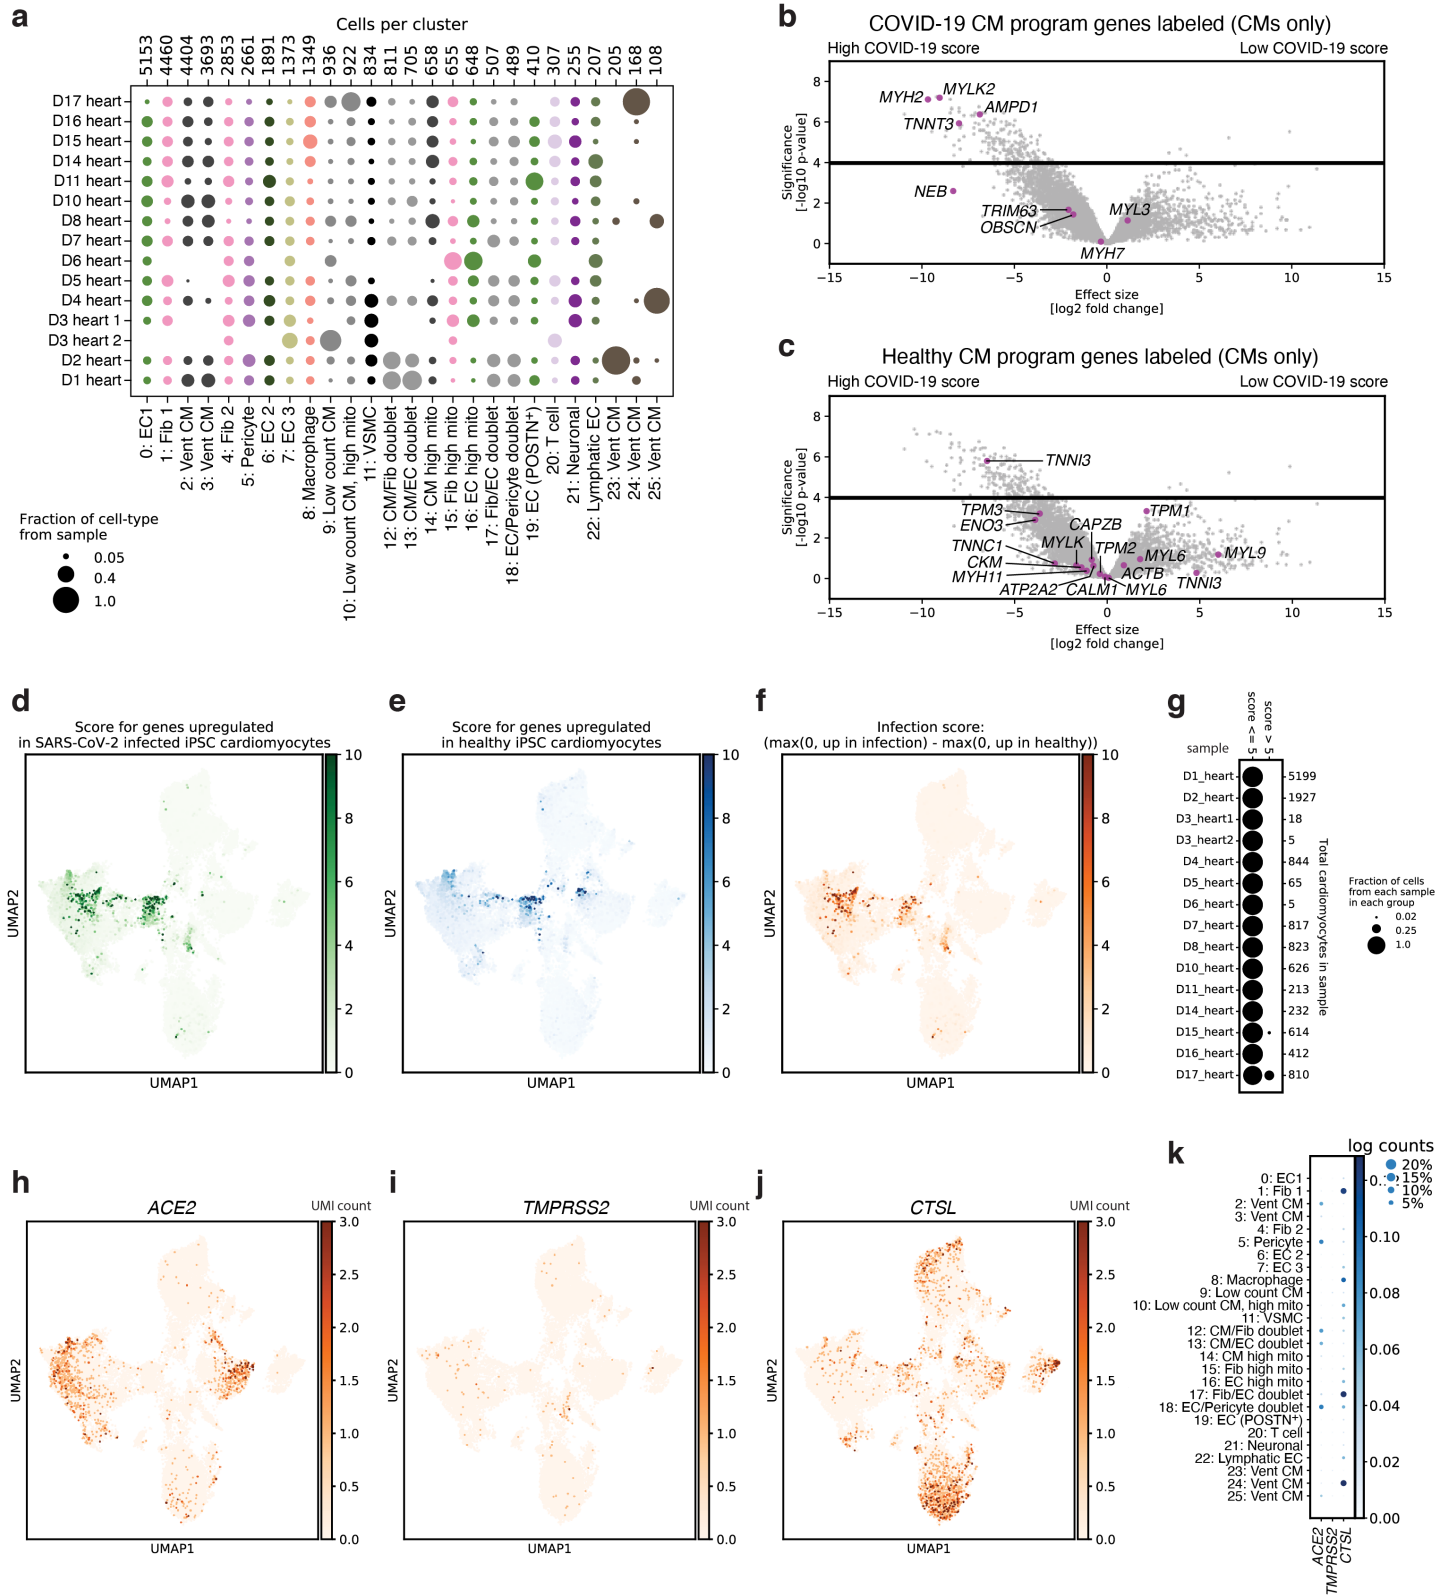



## Supplemental Fig. 15

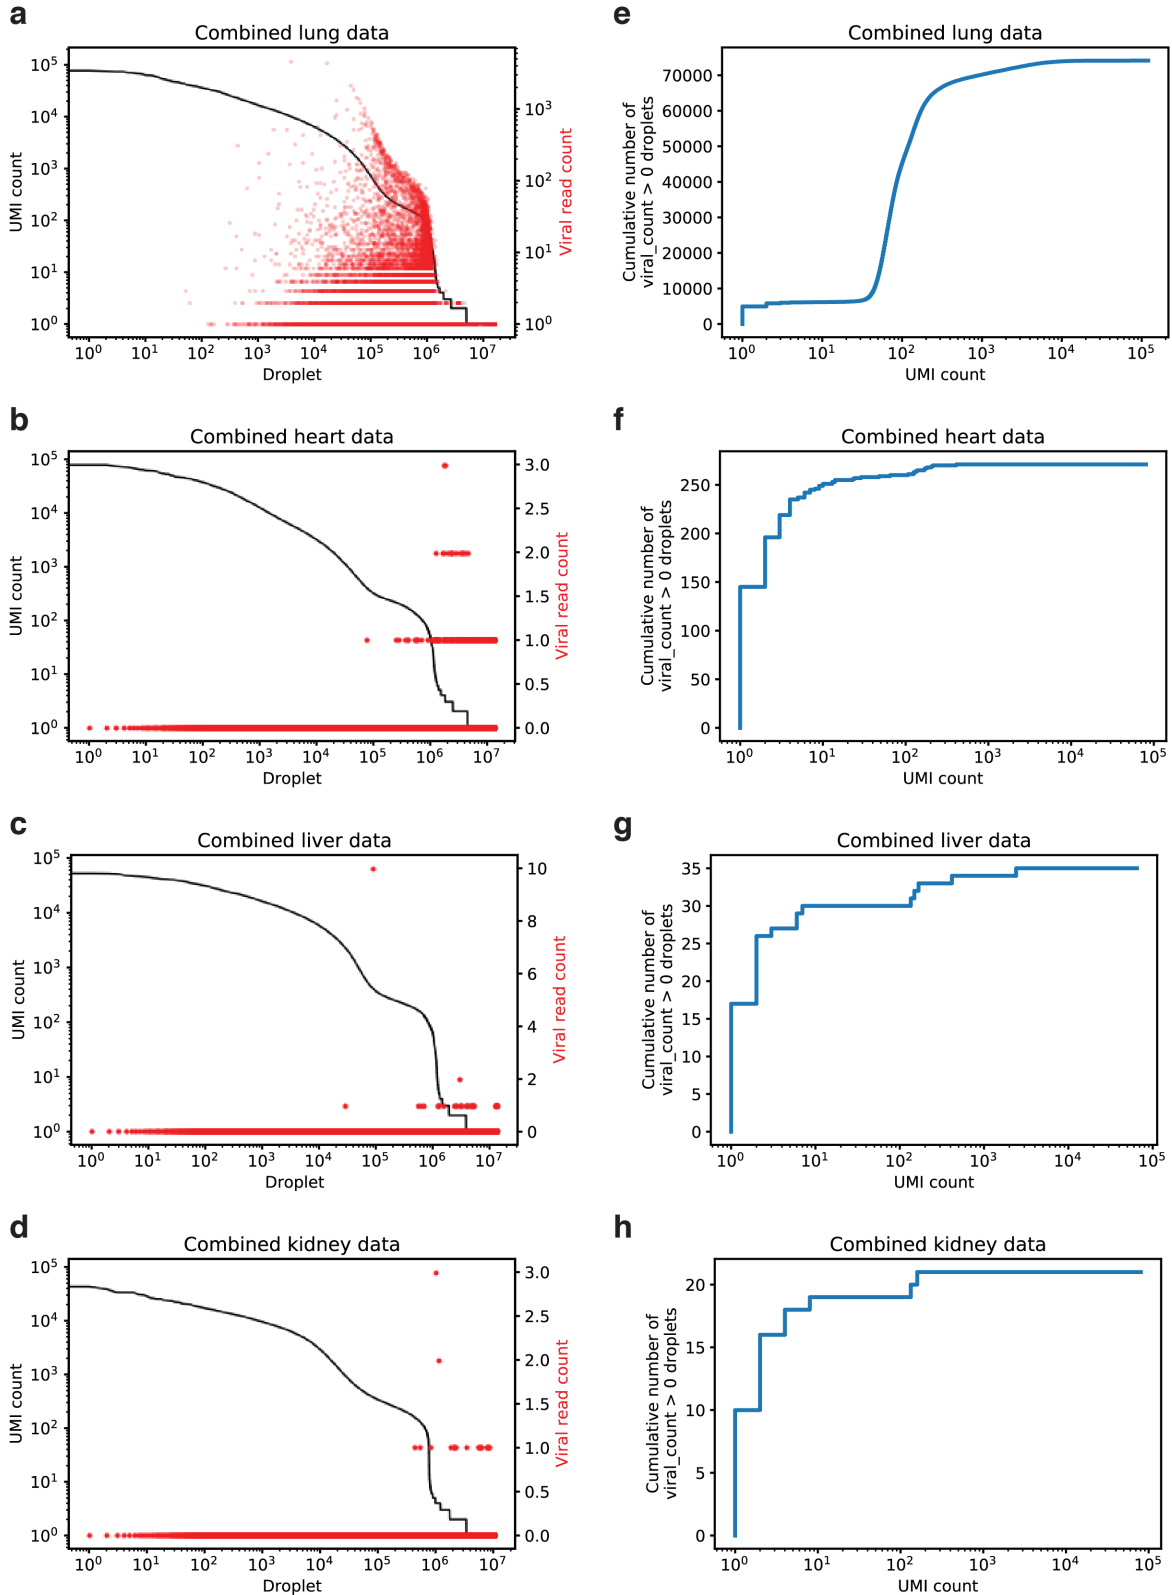

# Supplemental Fig. 16

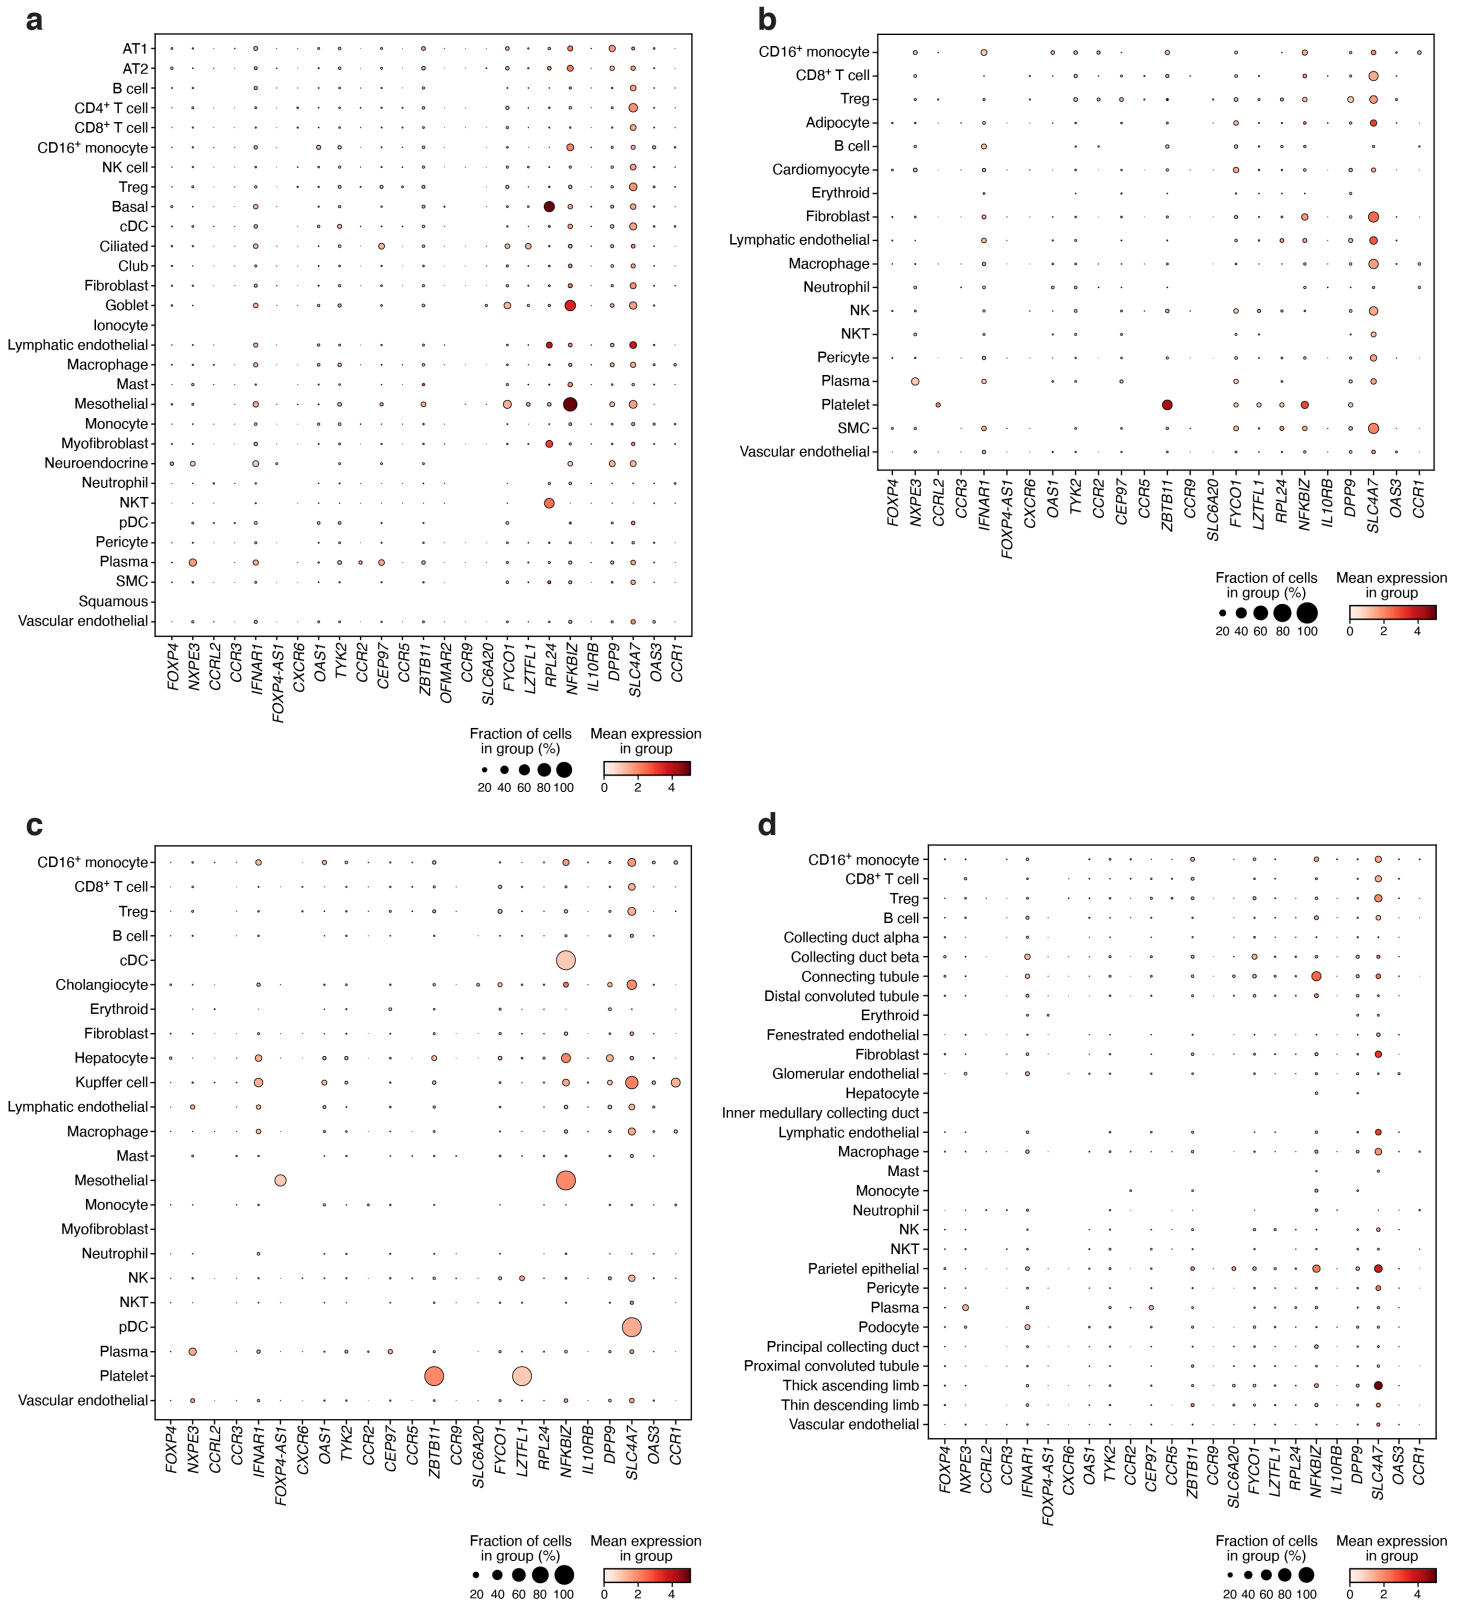

Supplement: NIHPP2021.02.25.430130-supplement-1.pdf [file NIHPP2021.02.25.430130-supplement-1.pdf]
